# Supplementary material
Source: publisher figshare collection journal article supplement (https://acs.figshare.com/ndownloader/files/9083437)
Supplement: Supplementary file 1 [file 9083437]

## Supporting information

# Confined Space Assisted Preparation of Fe<sub>3</sub>O<sub>4</sub> Nanoparticles Modified Fe-N-C Catalysts derived from Covalent Organic Polymer for Oxygen Reduction

Jianing Guo, Yuanhui Cheng\*, Zhonghua Xiang\*

State Key Laboratory of Organic-Inorganic Composites, College of Chemical Engineering, College of Energy, Beijing University of Chemical Technology, Beijing 100029, China.

Email: xiangzh@mail.buct.edu.cn or chengyh@mail.buct.edu.cn.

Number of Pages: 7; Number of Figures: 9; Number of Tables: 1

---

### List of Contents

**Figure S1.** (a) and (b) TEM images of COP@K10.

**Figure S2.** (a) HRTEM image of COP@K10-Fe-900, (b-d) EDX-mapping of total, C and Fe elements from HAADF-STEM image of COP@K10-Fe-900.

**Figure S3.** The EDX-mapping of C, Fe and N elements of Fe<sub>3</sub>O<sub>4</sub> removed COP@K10-Fe-900.

**Figure S4.** The HRTEM images of (a) COP@K10-Fe-800, (b) COP@K10-Fe-900, (c) COP@K10-Fe-1000.

**Figure S5.** N<sub>2</sub> adsorption-desorption isotherm of (a) COP@K10 and (b) COP@K10-Fe-900 catalysts.

**Figure S6.** (a) The XPS spectra of COP@K10-Fe-900 (b) The high-resolution C 1s

spectra of COP@K10-Fe-900.

**Figure S7.** H<sub>2</sub>O<sub>2</sub> yield on different catalysts measured by RRDE in the alkaline solution.

**Figure S8.** (a) Rotating disk electrode (RDE) linear sweep voltammograms of COP@K10-Fe-900 at different rotating rates in the alkaline solution (b) Koutecky-Levich plots of COP@K10-Fe-900 derived from RDE voltammograms.

**Figure S9.** LSV curve of Fe<sub>3</sub>O<sub>4</sub> nanoparticles in O<sub>2</sub>-saturated 0.1 mol L<sup>-1</sup> KOH at 5 mV s<sup>-1</sup>.

**Table S1.** The BET specific surface area of COP@K10 and COP@K10-Fe-900.

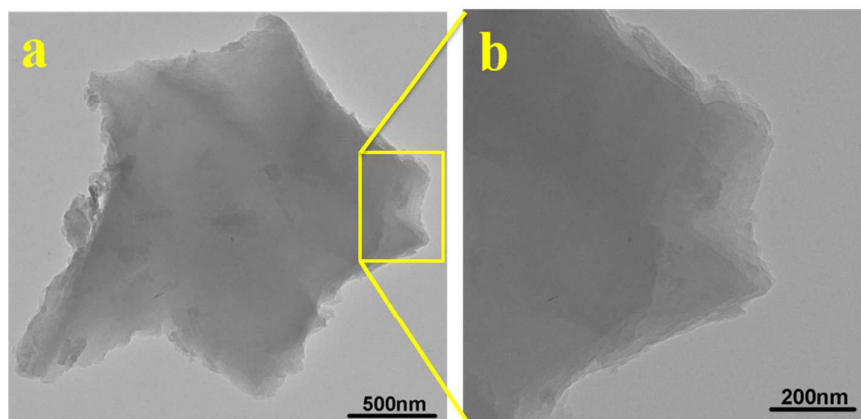

**Figure. S1.** (a) and (b) TEM images of COP@K10.

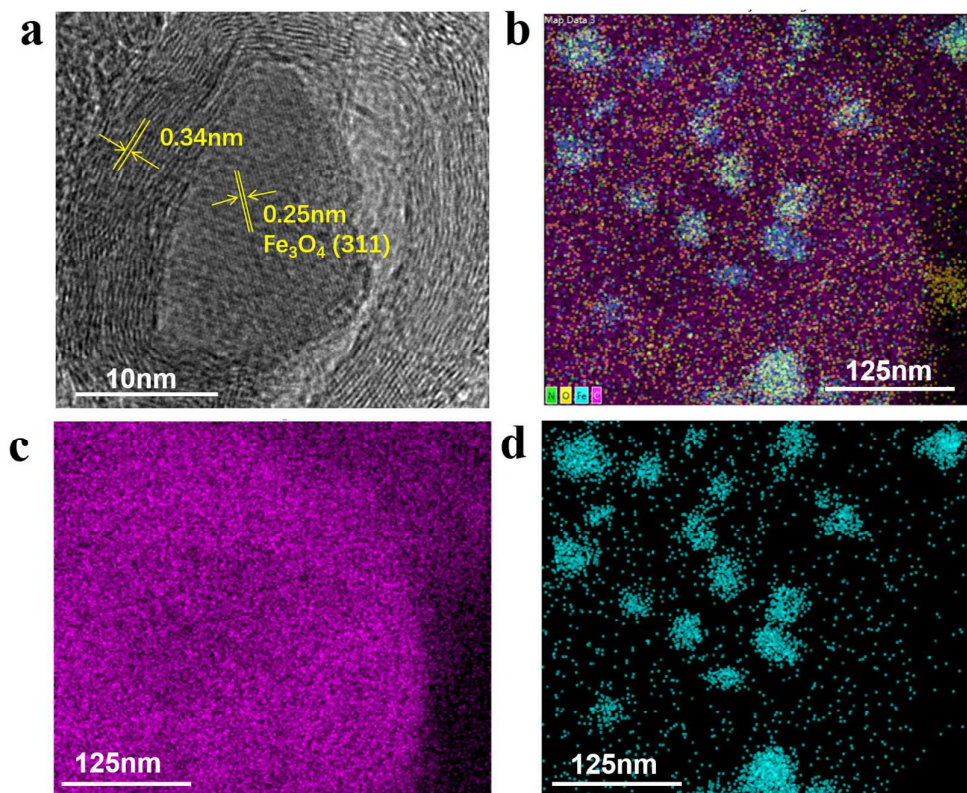

**Figure S2.** (a) HRTEM image of COP@K10-Fe-900, (b-d) EDX-mapping of total, C and Fe elements from HAADF-STEM image of COP@K10-Fe-900.

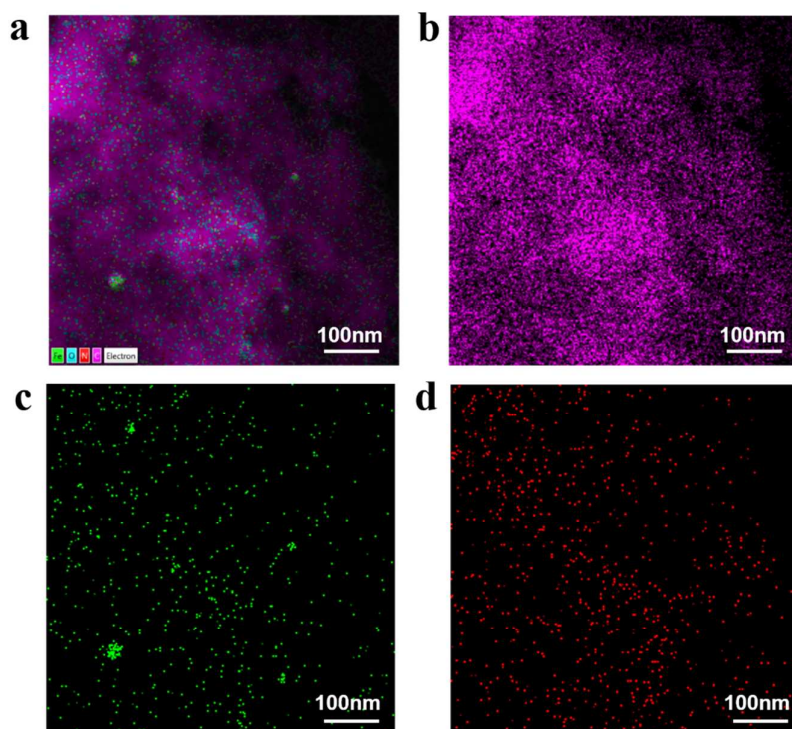

**Figure S3.** The EDX-mapping of C, Fe and N elements of  $\text{Fe}_3\text{O}_4$  removed COP@K10-Fe-900.

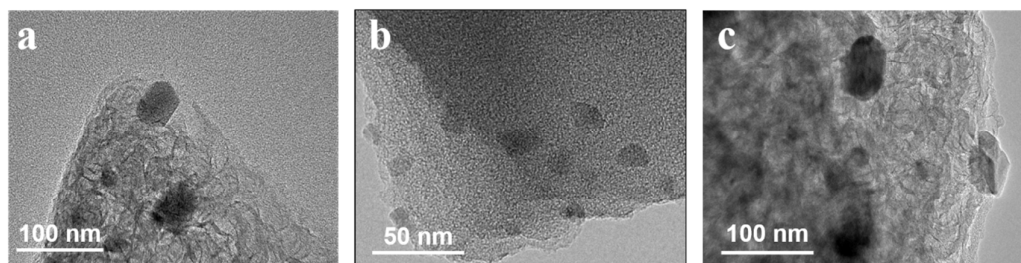

**Figure S4.** The HRTEM images of (a) COP@K10-Fe-800, (b) COP@K10-Fe-900, (c) COP@K10-Fe-1000.

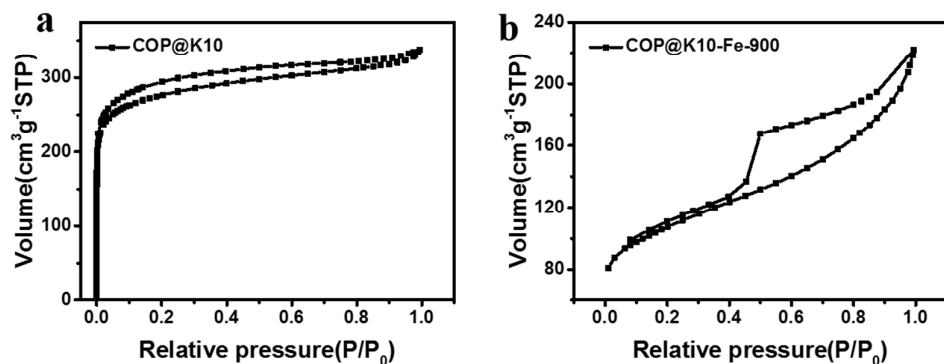

**Figure S5.**  $\text{N}_2$  adsorption-desorption isotherm of (a) COP@K10 and (b) COP@K10-Fe-900 catalysts.

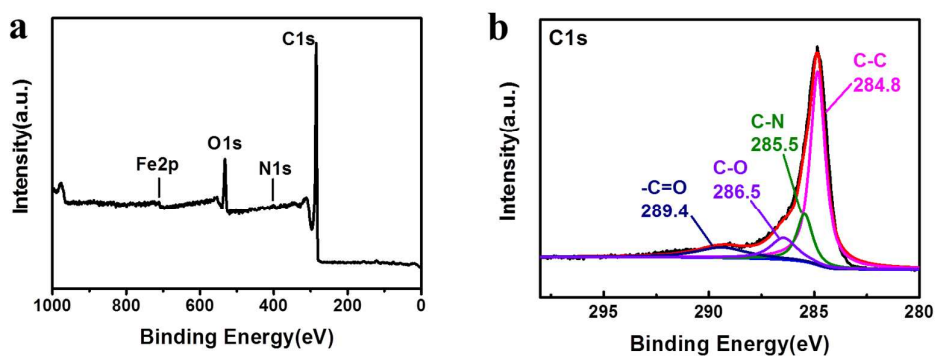

**Figure S6.** (a) The XPS spectra of COP@K10-Fe-900 (b) The high-resolution C 1s spectra of COP@K10-Fe-900.

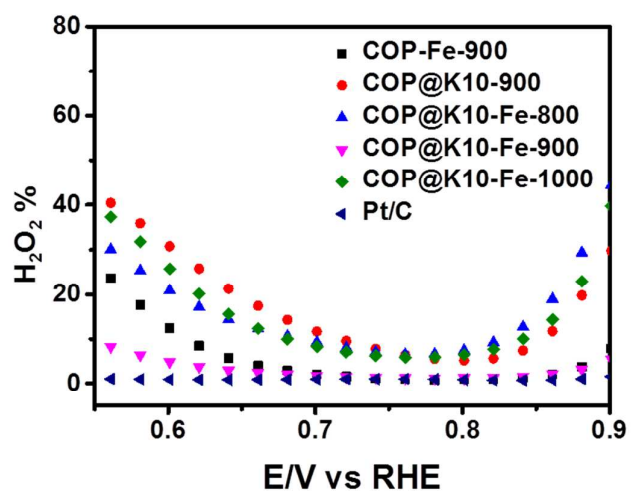

**Figure S7.**  $\text{H}_2\text{O}_2$  yield on different catalysts measured by RRDE in the alkaline solution.

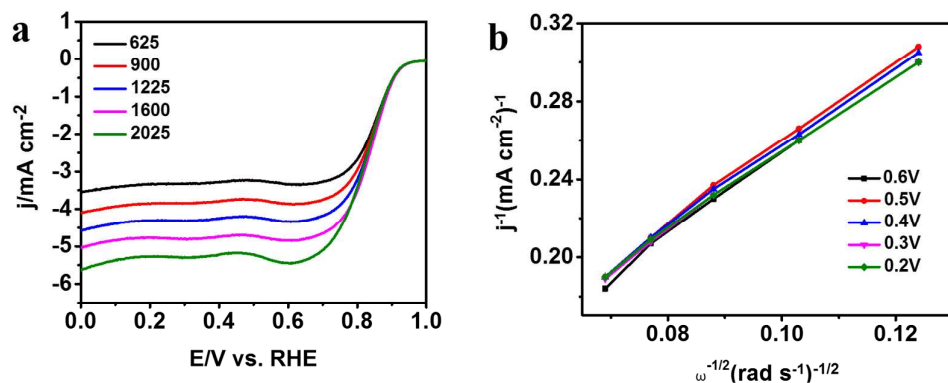

**Figure S8.** (a) Rotating disk electrode (RDE) linear sweep voltammograms of COP@K10-Fe-900 at different rotating rates in the alkaline solution (b) Koutecky-Levich plots of COP@K10-Fe-900 derived from RDE voltammograms.

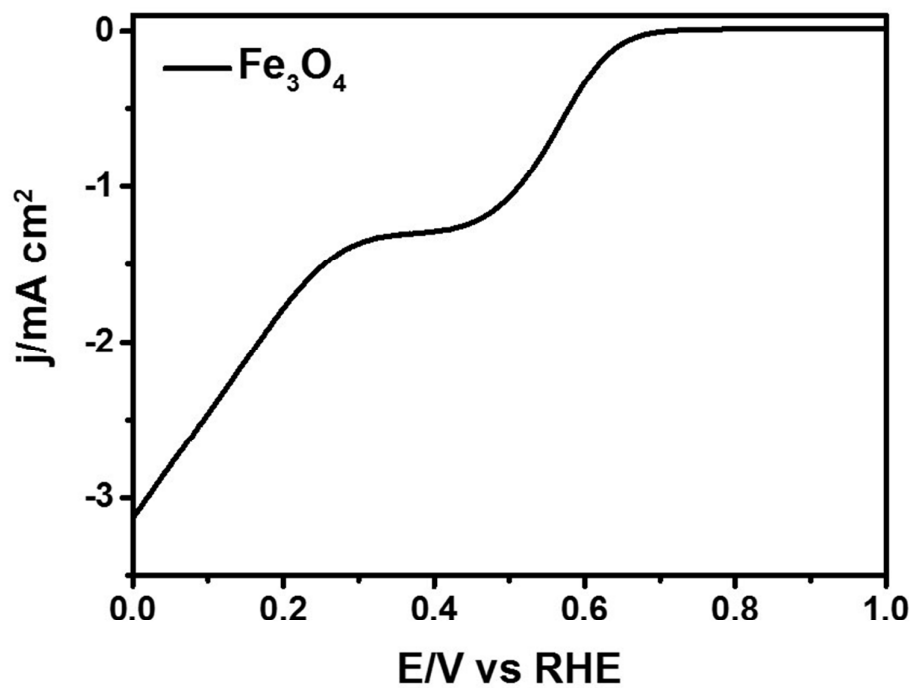

**Figure S9.** LSV curve of  $\text{Fe}_3\text{O}_4$  nanoparticles in  $\text{O}_2$ -saturated  $0.1 \text{ mol L}^{-1}$  KOH at  $5 \text{ mVs}^{-1}$ .

**Table S1.** The BET specific surface area of COP@K10 and COP@K10-Fe-900.

| Catalyst                                                  | COP @K10 | COP@K10-Fe-900 |
|-----------------------------------------------------------|----------|----------------|
| BET specific surface area ( $\text{m}^2 \text{ g}^{-1}$ ) | 875.6191 | 352.2472       |
